# Supplementary material
Source: PubMed Central journal article supplement (PMC7850038)
Supplement: web_material_kwaa206.pdf [file web_material_kwaa206.pdf]

## Neighborhood Deprivation, Obesity and Diabetes in Gulf Residents

Michael D. Hu, Kaitlyn G. Lawrence, Mark R. Bodkin, Richard K. Kwok, Lawrence S. Engel, Dale P. Sandler

|              |         |
|--------------|---------|
| Web Figure 1 | Page 2  |
| Web Table 1  | Page 3  |
| Web Table 2  | Page 5  |
| Web Table 3  | Page 6  |
| Web Table 4  | Page 7  |
| Web Table 5  | Page 8  |
| Web Table 6  | Page 9  |
| Web Table 7  | Page 10 |
| Web Table 8  | Page 11 |
| Web Table 9  | Page 12 |
| Web Table 10 | Page 13 |
| Web Table 11 | Page 14 |

Web Figure 1: Directed Acyclic Graph, GuLF Study

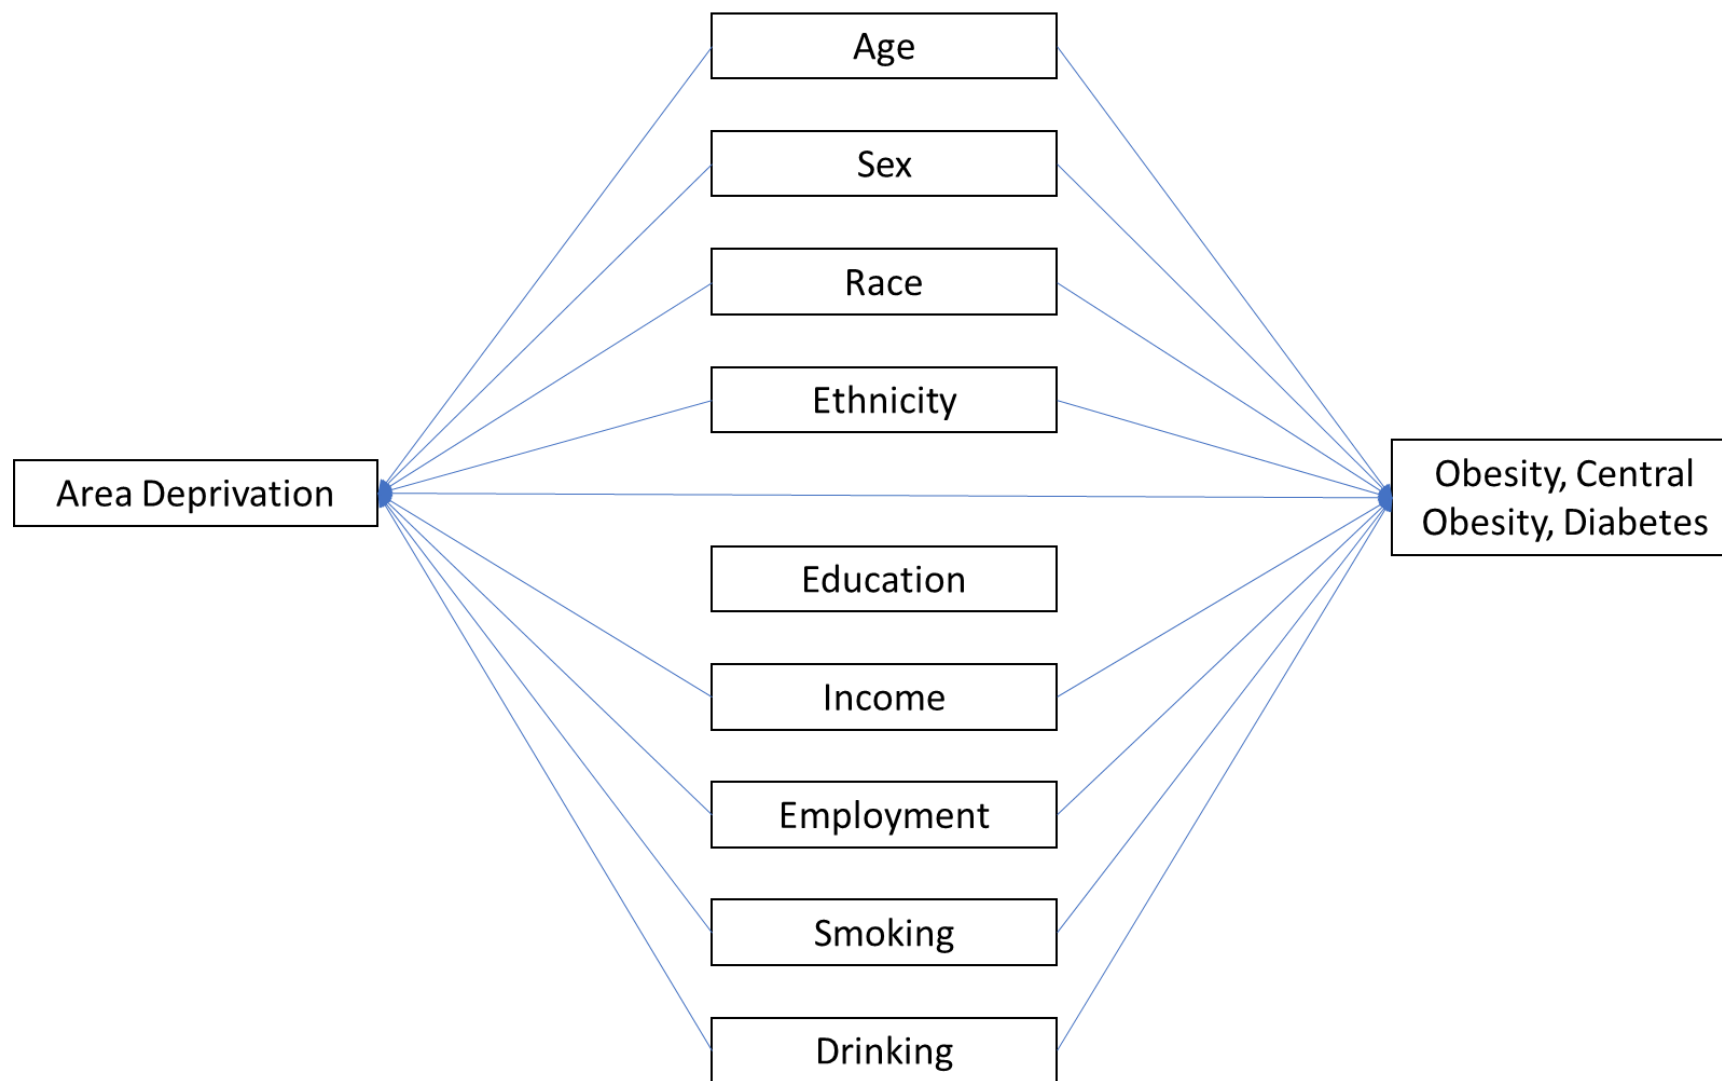

Web Table 1: Sociodemographic characteristics of the home visit and clinic exam analytic samples, GuLF Study

| Characteristic                           | Home Visit (n=9,626) | Clinic Exam (n=3,016) |
|------------------------------------------|----------------------|-----------------------|
|                                          | No. (%)              |                       |
| Age, Years                               | 44 (13) <sup>a</sup> | 49 (13) <sup>a</sup>  |
| Area Deprivation Index (Scale: 0 to 100) | 64 (22) <sup>a</sup> | 65 (21) <sup>a</sup>  |
| Sex                                      |                      |                       |
| Male                                     | 7502 (78)            | 2300 (76)             |
| Female                                   | 2124 (22)            | 716 (24)              |
| Race                                     |                      |                       |
| White                                    | 5296 (55)            | 1559 (52)             |
| Black                                    | 3337 (35)            | 1196 (40)             |
| Other                                    | 993 (10)             | 261 (9)               |
| Ethnicity                                |                      |                       |
| Hispanic                                 | 577 (6)              | 71 (2)                |
| Non-Hispanic                             | 9049 (94)            | 2945 (98)             |
| Smoking Status                           |                      |                       |
| Heavy current smoker                     | 1212 (13)            | 327 (11)              |
| Light current smoker                     | 2305 (24)            | 657 (22)              |
| Former smoker                            | 2023 (21)            | 693 (23)              |
| Never smoker                             | 4086 (42)            | 1339 (44)             |
| Drinking Status                          |                      |                       |
| Current drinker                          | 6878 (71)            | 2148 (71)             |
| Former drinker                           | 2058 (21)            | 652 (22)              |
| Never drinker                            | 690 (7)              | 216 (7)               |
| Education                                |                      |                       |
| <High School/Equivalent                  | 1990 (21)            | 629 (21)              |
| High school diploma/GED                  | 3270 (34)            | 1050 (35)             |
| Some college/2-year degree               | 2922 (30)            | 902 (30)              |
| ≥4 year college graduate                 | 1444 (15)            | 435 (14)              |
| Employment                               |                      |                       |
| Working now                              | 5205 (54)            | 1583 (52)             |
| Looking for work/unemployed              | 2614 (27)            | 822 (27)              |
| Other                                    | 1807 (19)            | 611 (20)              |
| Household Income                         |                      |                       |
| < \$20,000                               | 3823 (40)            | 1185 (39)             |
| \$20,000-\$49,000                        | 3205 (33)            | 1004 (33)             |

|            |           |          |
|------------|-----------|----------|
| ≥ \$50,000 | 2598 (27) | 827 (27) |
|------------|-----------|----------|

GED: General Education Development test

<sup>a</sup>Values are expressed as mean (standard deviation)

Web Table 2. Associations of Neighborhood Deprivation with Obesity and Diabetes at the Clinic Exam, GuLF Study (2014-2016) (N=3,016)<sup>a</sup>

|                                  | Level 1/2 (1-49, N=811) |           | Level 3 (50-74, N=1,034) |            | Level 4 (75-100, N=1,171) |            |
|----------------------------------|-------------------------|-----------|--------------------------|------------|---------------------------|------------|
|                                  | aPR                     | 95% CI    | aPR                      | 95% CI     | aPR                       | 95% CI     |
| Diabetes vs. normal <sup>b</sup> | 1.00                    | Reference | 1.46                     | 1.12, 1.88 | 1.37                      | 1.03, 1.82 |

aPR: adjusted Prevalence Ratio, CI: Confidence Interval

<sup>a</sup>Models adjusted for age at clinic exam, sex, race, ethnicity, smoking status, drinking, education, income and employment.

<sup>b</sup>Home visit definition of diabetes: previous provider diagnoses or reported use of medications for diabetes

Web Table 3. Associations of Neighborhood Deprivation with Obesity and Diabetes at the Home Visit, Within-Sample Quartiles, GuLF Study (2011-2013) (N=9,626)<sup>a</sup>

|                                                                   | Quartile 1<br>(N=2,344) |           | Quartile 2<br>(N=2,418) |            | Quartile 3<br>(N=2,519) |            | Quartile 4<br>(N=2,345) |            |
|-------------------------------------------------------------------|-------------------------|-----------|-------------------------|------------|-------------------------|------------|-------------------------|------------|
|                                                                   | aPR                     | 95% CI    | aPR                     | 95% CI     | aPR                     | 95% CI     | aPR                     | 95% CI     |
| <b>Body Mass Index Status</b>                                     |                         |           |                         |            |                         |            |                         |            |
| Overweight/Obese vs. Normal                                       | 1.00                    | Reference | 1.03                    | 1.00, 1.06 | 1.03                    | 1.00, 1.07 | 1.00                    | 0.97, 1.04 |
| Obese vs. Normal                                                  | 1.00                    | Reference | 1.07                    | 1.02, 1.13 | 1.08                    | 1.02, 1.14 | 1.04                    | 0.98, 1.11 |
| <b>Central Obesity</b>                                            |                         |           |                         |            |                         |            |                         |            |
| Waist-to-hip ratio of > 0.85 for women, > 0.90 for men vs. normal | 1.00                    | Reference | 1.04                    | 1.00, 1.07 | 1.04                    | 1.00, 1.07 | 1.03                    | 0.99, 1.07 |
| <b>Self-Reported Diabetes Diagnosis</b>                           |                         |           |                         |            |                         |            |                         |            |
| Yes vs. No                                                        | 1.00                    | Reference | 1.13                    | 0.95, 1.36 | 1.20                    | 1.00, 1.43 | 1.17                    | 0.96, 1.42 |

aPR: adjusted Prevalence Ratio, CI: Confidence Interval

<sup>a</sup>Models adjusted for age at home visit, sex, race, ethnicity, smoking status, drinking, education, income and employment. Quartiles were determined by the distribution of participants in our analytic sample.

Web Table 4. Associations of Neighborhood Deprivation with Obesity and Diabetes at the Clinic Exam, Within-Sample Quartiles, GuLF Study (2014-2016) (N=3,016)<sup>a</sup>

|                                                                   | Quartile 1 (N=757) |           | Quartile 2 (N=736) |            | Quartile 3 (N=800) |            | Quartile 4 (N=723) |            |
|-------------------------------------------------------------------|--------------------|-----------|--------------------|------------|--------------------|------------|--------------------|------------|
|                                                                   | aPR                | 95% CI    | aPR                | 95% CI     | aPR                | 95% CI     | aPR                | 95% CI     |
| Obesity                                                           |                    |           |                    |            |                    |            |                    |            |
| Overweight/Obese vs. Normal                                       | 1.00               | Reference | 1.00               | 0.95, 1.05 | 0.99               | 0.94, 1.04 | 0.98               | 0.92, 1.04 |
| Obese vs. Normal                                                  | 1.00               | Reference | 1.00               | 0.93, 1.09 | 1.01               | 0.94, 1.09 | 0.98               | 0.90, 1.07 |
| Central Obesity                                                   |                    |           |                    |            |                    |            |                    |            |
| Waist-to-hip ratio of > 0.85 for women, > 0.90 for men vs. normal | 1.00               | Reference | 1.04               | 0.99, 1.10 | 1.01               | 0.96, 1.07 | 1.02               | 0.95, 1.09 |
| Diabetes                                                          |                    |           |                    |            |                    |            |                    |            |
| Prediabetes/Diabetes vs. normal                                   | 1.00               | Reference | 1.17               | 1.01, 1.36 | 1.30               | 1.12, 1.50 | 1.17               | 1.00, 1.36 |
| Diabetes vs. normal                                               | 1.00               | Reference | 1.47               | 1.11, 1.94 | 1.64               | 1.27, 2.11 | 1.47               | 1.11, 1.94 |

aPR: adjusted Prevalence Ratio, CI: Confidence Interval

<sup>a</sup>Models adjusted for age at clinic exam, sex, race, ethnicity, smoking status, drinking, education, income and employment. Quartiles were determined by the distribution of participants in our analytic sample.

Web Table 5. Associations of Neighborhood Deprivation with Obesity and Diabetes at the Home Visit, Race-Stratified, GuLF Study (2011-2013)<sup>a</sup>

| <b>White</b> (N=5,296)                                            | Level 1 (1-24, N=378) |           | Level 2 (25-49, N=1,608) |            | Level 3 (50-74, N=2,061) |            | Level 4 (75-100, N=1,249) |            |
|-------------------------------------------------------------------|-----------------------|-----------|--------------------------|------------|--------------------------|------------|---------------------------|------------|
|                                                                   | aPR                   | 95% CI    | aPR                      | 95% CI     | aPR                      | 95% CI     | aPR                       | 95% CI     |
| Body Mass Index Status                                            |                       |           |                          |            |                          |            |                           |            |
| Overweight/Obese vs. Normal                                       | 1.00                  | Reference | 1.06                     | 0.99, 1.13 | 1.08                     | 1.02, 1.16 | 1.07                      | 1.00, 1.15 |
| Obese vs. Normal                                                  | 1.00                  | Reference | 1.11                     | 0.99, 1.25 | 1.17                     | 1.04, 1.31 | 1.17                      | 1.04, 1.33 |
| Central Obesity                                                   |                       |           |                          |            |                          |            |                           |            |
| Waist-to-hip ratio of > 0.85 for women, > 0.90 for men vs. normal | 1.00                  | Reference | 1.04                     | 0.98, 1.11 | 1.07                     | 1.01, 1.15 | 1.11                      | 1.03, 1.18 |
| Self-Reported Diabetes Diagnosis                                  |                       |           |                          |            |                          |            |                           |            |
| Yes vs. No                                                        | 1.00                  | Reference | 1.34                     | 0.90, 2.00 | 1.58                     | 1.06, 2.35 | 1.60                      | 1.06, 2.41 |
| <b>Black</b> (N=3,337)                                            | Level 1 (1-24, N=28)  |           | Level 2 (25-49, N=344)   |            | Level 3 (50-74, N=932)   |            | Level 4 (75-100, N=2,033) |            |
|                                                                   | aPR                   | 95% CI    | aPR                      | 95% CI     | aPR                      | 95% CI     | aPR                       | 95% CI     |
| Body Mass Index Status                                            |                       |           |                          |            |                          |            |                           |            |
| Overweight/Obese vs. Normal                                       | 1.00                  | Reference | 1.57                     | 1.14, 2.17 | 1.55                     | 1.12, 2.14 | 1.48                      | 1.07, 2.04 |
| Obese vs. Normal                                                  | 1.00                  | Reference | 1.69                     | 1.09, 2.62 | 1.68                     | 1.09, 2.59 | 1.59                      | 1.03, 2.44 |
| Central Obesity                                                   |                       |           |                          |            |                          |            |                           |            |
| Waist-to-hip ratio of > 0.85 for women, > 0.90 for men vs. normal | 1.00                  | Reference | 1.34                     | 0.94, 1.92 | 1.34                     | 0.94, 1.90 | 1.33                      | 0.94, 1.89 |
| Self-Reported Diabetes Diagnosis                                  |                       |           |                          |            |                          |            |                           |            |
| Yes vs. No                                                        | 1.00                  | Reference | 0.76                     | 0.30, 1.93 | 0.68                     | 0.27, 1.68 | 0.65                      | 0.26, 1.60 |

aPR: adjusted Prevalence Ratio, CI: Confidence Interval

<sup>a</sup>Models adjusted for age at home visit, sex, ethnicity, smoking status, drinking, education, income and employment.



Web Table 6. Associations of Neighborhood Deprivation with Obesity and Diabetes at the Home Visit<sup>a</sup>, Race-Stratified, Within-Sample Quartiles, GuLF Study (2011-2013)<sup>b</sup>

| <b>White</b> (N=5,296)                                            | Quartile 1<br>(N=1,787) |           | Quartile 2<br>(N=1,572) |            | Quartile 3<br>(N=1,282) |            | Quartile 4 (N=655)   |            |
|-------------------------------------------------------------------|-------------------------|-----------|-------------------------|------------|-------------------------|------------|----------------------|------------|
|                                                                   | aPR                     | 95% CI    | aPR                     | 95% CI     | aPR                     | 95% CI     | aPR                  | 95% CI     |
| Body Mass Index Status                                            |                         |           |                         |            |                         |            |                      |            |
| Overweight/Obese vs. Normal                                       | 1.00                    | Reference | 1.03                    | 0.99, 1.07 | 1.04                    | 1.00, 1.09 | 1.01                 | 0.96, 1.07 |
| Obese vs. Normal                                                  | 1.00                    | Reference | 1.06                    | 1.00, 1.14 | 1.10                    | 1.03, 1.18 | 1.06                 | 0.97, 1.16 |
| Central Obesity                                                   |                         |           |                         |            |                         |            |                      |            |
| Waist-to-hip ratio of > 0.85 for women, > 0.90 for men vs. normal | 1.00                    | Reference | 1.03                    | 1.00, 1.07 | 1.04                    | 1.00, 1.08 | 1.06                 | 1.01, 1.11 |
| Self-Reported Diabetes Diagnosis                                  |                         |           |                         |            |                         |            |                      |            |
| Yes vs. No                                                        | 1.00                    | Reference | 1.16                    | 0.94, 1.44 | 1.27                    | 1.02, 1.59 | 1.25                 | 0.94, 1.64 |
| <b>Black</b> (N=3,337)                                            | Quartile 1 (N=332)      |           | Quartile 2 (N=547)      |            | Quartile 3 (N=983)      |            | Quartile 4 (N=1,475) |            |
|                                                                   | aPR                     | 95% CI    | aPR                     | 95% CI     | aPR                     | 95% CI     | aPR                  | 95% CI     |
| Body Mass Index Status                                            |                         |           |                         |            |                         |            |                      |            |
| Overweight/Obese vs. Normal                                       | 1.00                    | Reference | 1.03                    | 0.96, 1.11 | 1.00                    | 0.91, 1.04 | 0.97                 | 0.91, 1.04 |
| Obese vs. Normal                                                  | 1.00                    | Reference | 1.07                    | 0.96, 1.19 | 1.00                    | 0.91, 1.11 | 0.98                 | 0.89, 1.08 |
| Central Obesity                                                   |                         |           |                         |            |                         |            |                      |            |
| Waist-to-hip ratio of > 0.85 for women, > 0.90 for men vs. normal | 1.00                    | Reference | 1.04                    | 0.94, 1.14 | 1.00                    | 0.91, 1.09 | 1.00                 | 0.92, 1.09 |
| Self-Reported Diabetes Diagnosis                                  |                         |           |                         |            |                         |            |                      |            |
| Yes vs. No                                                        | 1.00                    | Reference | 0.91                    | 0.63, 1.32 | 0.81                    | 0.57, 1.15 | 0.92                 | 0.66, 1.27 |

aPR: adjusted Prevalence Ratio, CI: Confidence Interval

<sup>a</sup>Models adjusted for age at home visit, sex, ethnicity, smoking status, drinking, education, income and employment.

<sup>b</sup>Quartiles were created per our overall sample distribution, prior to stratification by race, and the lowest (least deprived) quartile served as the referent

Web Table 7. Associations of Neighborhood Deprivation with Obesity and Diabetes at the Home Visit, Imputed Dataset, GuLF Study (2011-2013) (N=11,193)<sup>a</sup>

|                                                                   | Level 1 (1-24,<br>N=439) |           | Level 2 (25-49,<br>N=2,177) |            | Level 3 (50-74,<br>N=3,390) |            | Level 4 (75-100,<br>N=3,620) |            |
|-------------------------------------------------------------------|--------------------------|-----------|-----------------------------|------------|-----------------------------|------------|------------------------------|------------|
|                                                                   | aPR                      | 95% CI    | aPR                         | 95% CI     | aPR                         | 95% CI     | aPR                          | 95% CI     |
| Body Mass Index Status                                            |                          |           |                             |            |                             |            |                              |            |
| Overweight/Obese vs. Normal                                       | 1.00                     | Reference | 1.08                        | 1.02, 1.15 | 1.10                        | 1.04, 1.17 | 1.07                         | 1.01, 1.14 |
| Obese vs. Normal                                                  | 1.00                     | Reference | 1.15                        | 1.04, 1.27 | 1.20                        | 1.09, 1.33 | 1.16                         | 1.05, 1.29 |
| Central Obesity                                                   |                          |           |                             |            |                             |            |                              |            |
| Waist-to-hip ratio of > 0.85 for women, > 0.90 for men vs. normal | 1.00                     | Reference | 1.09                        | 1.02, 1.16 | 1.11                        | 1.05, 1.18 | 1.12                         | 1.05, 1.19 |
| Self-Reported Diabetes Diagnosis                                  |                          |           |                             |            |                             |            |                              |            |
| Yes vs. No                                                        | 1.00                     | Reference | 1.28                        | 0.92, 1.80 | 1.52                        | 1.10, 2.11 | 1.40                         | 1.00, 1.95 |

aPR: adjusted Prevalence Ratio, CI: Confidence Interval

<sup>a</sup>Models adjusted for age at home visit, sex, race, ethnicity, smoking status, drinking, education, income and employment.

Web Table 8. Associations of Neighborhood Deprivation with Obesity and Diabetes at the Clinic Exam, Imputed Dataset, GuLF Study (2014-2016)(N=3,401)<sup>a</sup>

|                                                                   | Level 1/2 (1-49) |           | Level 3 (50-74) |            | Level 4 (75-100) |            |
|-------------------------------------------------------------------|------------------|-----------|-----------------|------------|------------------|------------|
|                                                                   | aPR              | 95% CI    | aPR             | 95% CI     | aPR              | 95% CI     |
| Body Mass Index Status                                            |                  |           |                 |            |                  |            |
| Overweight/Obese vs. Normal                                       | 1.00             | Reference | 1.00            | 0.96, 1.04 | 0.98             | 0.93, 1.03 |
| Obese vs. Normal                                                  | 1.00             | Reference | 1.01            | 0.94, 1.08 | 0.98             | 0.91, 1.05 |
| Central Obesity                                                   |                  |           |                 |            |                  |            |
| Waist-to-hip ratio of > 0.85 for women, > 0.90 for men vs. normal | 1.00             | Reference | 1.02            | 0.97, 1.07 | 1.01             | 0.96, 1.06 |
| Diabetes                                                          |                  |           |                 |            |                  |            |
| Prediabetes/Diabetes vs. normal                                   | 1.00             | Reference | 1.18            | 1.04, 1.34 | 1.15             | 1.01, 1.31 |
| Diabetes vs. normal                                               | 1.00             | Reference | 1.44            | 1.16, 1.79 | 1.44             | 1.15, 1.82 |

aPR: adjusted Prevalence Ratio, CI: Confidence Interval

<sup>a</sup>Models adjusted for age at clinic exam, sex, race, ethnicity, smoking status, drinking, education, income and employment.

Web Table 9. Associations of Neighborhood Deprivation with Obesity and Diabetes at the Home Visit, GuLF Study (2011-2013) (N=9,626)<sup>a</sup>

|                                                                   | aPR  | Level 1 (1-24,<br>N=439) | Level 2 (25-49,<br>N=2,177) | Level 3 (50-74,<br>N=3,390) | Level 4 (75-100,<br>N=3,620) |            |      |            |
|-------------------------------------------------------------------|------|--------------------------|-----------------------------|-----------------------------|------------------------------|------------|------|------------|
|                                                                   |      | 95% CI                   | aPR                         | 95% CI                      | aPR                          | 95% CI     | aPR  | 95% CI     |
| Body Mass Index Status                                            |      |                          |                             |                             |                              |            |      |            |
| Overweight/Obese vs. Normal                                       | 1.00 | Reference                | 1.08                        | 1.01, 1.15                  | 1.09                         | 1.02, 1.16 | 1.07 | 1.01, 1.14 |
| Obese vs. Normal                                                  | 1.00 | Reference                | 1.14                        | 1.02, 1.28                  | 1.19                         | 1.07, 1.33 | 1.19 | 1.07, 1.33 |
| Central Obesity                                                   |      |                          |                             |                             |                              |            |      |            |
| Waist-to-hip ratio of > 0.85 for women, > 0.90 for men vs. normal | 1.00 | Reference                | 1.08                        | 1.01, 1.15                  | 1.10                         | 1.04, 1.17 | 1.09 | 1.02, 1.16 |
| Self-Reported Diabetes Diagnosis                                  |      |                          |                             |                             |                              |            |      |            |
| Yes vs. No                                                        | 1.00 | Reference                | 1.48                        | 1.03, 2.12                  | 1.82                         | 1.28, 2.58 | 1.85 | 1.30, 2.63 |

aPR: adjusted Prevalence Ratio, CI: Confidence Interval

<sup>a</sup>Adjusted only for age at home visit

Web Table 10. Associations of Neighborhood Deprivation with Obesity and Diabetes at the Home Visit, GuLF Study (2011-2013) (N=9,626)<sup>a</sup>

|                                                                   | Level 1 (1-24,<br>N=439) |           | Level 2 (25-49,<br>N=2,177) |            | Level 3 (50-74,<br>N=3,390) |            | Level 4 (75-100,<br>N=3,620) |            |
|-------------------------------------------------------------------|--------------------------|-----------|-----------------------------|------------|-----------------------------|------------|------------------------------|------------|
|                                                                   | aPR                      | 95% CI    | aPR                         | 95% CI     | aPR                         | 95% CI     | aPR                          | 95% CI     |
| Body Mass Index Status                                            |                          |           |                             |            |                             |            |                              |            |
| Overweight/Obese vs. Normal                                       | 1.00                     | Reference | 1.10                        | 1.03, 1.17 | 1.12                        | 1.05, 1.19 | 1.09                         | 1.02, 1.16 |
| Obese vs. Normal                                                  | 1.00                     | Reference | 1.17                        | 1.05, 1.31 | 1.23                        | 1.10, 1.37 | 1.20                         | 1.08, 1.34 |
| Central Obesity                                                   |                          |           |                             |            |                             |            |                              |            |
| Waist-to-hip ratio of > 0.85 for women, > 0.90 for men vs. normal | 1.00                     | Reference | 1.07                        | 1.00, 1.14 | 1.09                        | 1.03, 1.16 | 1.11                         | 1.04, 1.18 |
| Self-Reported Diabetes Diagnosis                                  |                          |           |                             |            |                             |            |                              |            |
| Yes vs. No                                                        | 1.00                     | Reference | 1.40                        | 0.98, 2.02 | 1.60                        | 1.12, 2.30 | 1.53                         | 1.06, 2.20 |

aPR: adjusted Prevalence Ratio, CI: Confidence Interval

<sup>a</sup>Model adjusted for age at home visit, sex, race, ethnicity, smoking status, drinking, education, income, employment, and maximum total hydrocarbon exposure

Web Table 11. Associations of Neighborhood Deprivation with Incident Obesity and Diabetes at the Clinic Exam, GuLF Study (2014-2016) (N=3,016)<sup>a</sup>

|                                                                   | No. Positive | Area Deprivation Index Level |           |                             |            |                              |            |
|-------------------------------------------------------------------|--------------|------------------------------|-----------|-----------------------------|------------|------------------------------|------------|
|                                                                   |              | Level 1/2 (1-49,<br>N=811)   |           | Level 3 (50-74,<br>N=1,034) |            | Level 4 (75-100,<br>N=1,171) |            |
|                                                                   |              | OR                           | 95% CI    | OR                          | 95% CI     | OR                           | 95% CI     |
| Obesity                                                           |              |                              |           |                             |            |                              |            |
| Overweight/Obese vs. Normal                                       | 253          | 1.00                         | Reference | 0.79                        | 0.60, 1.05 | 0.93                         | 0.68, 1.26 |
| Obese vs. Normal/Overweight                                       | 218          | 1.00                         | Reference | 1.02                        | 0.75, 1.38 | 1.07                         | 0.77, 1.49 |
| Central Obesity                                                   |              |                              |           |                             |            |                              |            |
| Waist-to-hip ratio of > 0.85 for women, > 0.90 for men vs. normal | 310          | 1.00                         | Reference | 1.07                        | 0.86, 1.34 | 1.03                         | 0.80, 1.31 |
| Diabetes                                                          |              |                              |           |                             |            |                              |            |
| Diabetes vs. normal <sup>b</sup>                                  | 69           | 1.00                         | Reference | 2.05                        | 1.03, 4.07 | 1.78                         | 0.83, 3.81 |

aPR: adjusted Prevalence Ratio, CI: Confidence Interval

<sup>a</sup>Adjusted for age at clinic exam, sex, race, ethnicity, smoking status, drinking, education, income and employment

<sup>b</sup>Home Visit definition: provider diagnoses of diabetes or use of diabetes medication
